# Supplementary material
Source: Research Square preprint supplement (doi:10.21203/rs.3.rs-9072853/v1)
Supplement: Supplementary file 1 [file 3c981f64a05747ac935cc943.docx]

**Table S1.** The soil water content of coppice dunes at different developmental stages.

| Development stage of coppice dunes | Soil water content (%) |
| --- | --- |
| Initial stage | 9.47 |
| Growth stage | 4.33 |
| Stable stage | 4.30 |
| Decline stage | 4.13 |

**Table S2.** Genes and their primers for qRT-PCR.

| Gene | Forward primer sequence | Reverse primer sequence |
| --- | --- | --- |
| *TRINITY_DN45_c0_g2* | GGCCAACCTCGTAACAGACA | GTGAAGAGGCCAAGGCAGAT |
| *TRINITY_DN90_c0_g1* | ACATACGGGCGATGTACGAC | TTAAGAGGCGCCTTGGGAAG |
| *TRINITY_DN3380_c0_g1* | TGGTGGATTACCTCCCGCTA | TGTTTTGCCCCACACCTTCT |
| *TRINITY_DN69462_c0_g1* | GGTGGAGGAAATACGGCCAA | TCTTGCAGCAGGAACATCGT |
| *TRINITY_DN763_c0_g1* | CACGTTGGCGGAAAACCATT | TCTTCAGCGGCATCCACATT |
| *TRINITY_DN63989_c0_g1* | GTCTGCAGTGGCAAAACCTG | TCATAGCCCCTCCGTACACA |
| *TRINITY_DN5091_c0_g1* | CAGCGGCTATGACGATGAGT | AACTCGGTCATGGACCAACC |
| *TRINITY_DN7651_c0_g1* | TACCGTCGGTGTTGGTCTTG | CGTCGGGATCGGGATTTGAT |
| *Actin* | TCGTAGCAGAGCATCGGAGAA | TGACCCATGCCAACCATAACA |

**Table S3.** Count statistics of DEM.

| Group | Total number | Different number | Up number | Down number |
| --- | --- | --- | --- | --- |
| ISL vs DSL | 4504 | 987 | 423 | 564 |
| SSL vs DSL | 4504 | 755 | 459 | 296 |
| ISL vs SSL | 4504 | 547 | 248 | 299 |
| ISL vs GSL | 4504 | 1981 | 1076 | 905 |
| GSL vs DSL | 4504 | 795 | 284 | 511 |
| GSL vs SSL | 4504 | 867 | 260 | 607 |

**Table S4.** The transcriptomic quality assessment.

| Sample | Read Number | Base Number | GC Content | %≥Q30 |
| --- | --- | --- | --- | --- |
| DSL-1 | 20,366,138 | 6,095,944,925 | 0.439 | 0.9693 |
| DSL-2 | 19,426,247 | 5,810,998,174 | 0.4389 | 0.9748 |
| DSL-3 | 21,163,076 | 6,330,933,219 | 0.4396 | 0.9629 |
| GSL-1 | 19,105,942 | 5,715,925,711 | 0.4319 | 0.973 |
| GSL-2 | 207,320,22 | 6,203,469,065 | 0.4335 | 0.9698 |
| GSL-3 | 19,167,252 | 5,733,436,170 | 0.4323 | 0.9683 |
| ISL-1 | 19,229,933 | 5,753,104,355 | 0.4528 | 0.9781 |
| ISL-2 | 20,099,717 | 6,016,400,094 | 0.453 | 0.9683 |
| ISL-3 | 20,342,960 | 6,089,927,763 | 0.4531 | 0.9707 |
| SSL-1 | 19,672,636 | 5,886,055,877 | 0.4502 | 0.9718 |
| SSL-2 | 19,212,118 | 5,745,891,573 | 0.4503 | 0.9737 |
| SSL-3 | 23,860,686 | 7,141,978,605 | 0.4504 | 0.9526 |

**Table S8. The abundance of key DAMs in glutathione metabolism, ABC transporters, and glycerophospholipid metabolism pathways.**

| Pathway | Name | ID | IS | GS | SS | DS |
| --- | --- | --- | --- | --- | --- | --- |
| Glutathione metabolism | NADP+ | pos_5628 | 9388.49 | 17150.20 | 8792.16 | 23599.42 |
| Bis-gamma-glutamylcystine | neg_9702 | 1359.62 | 6531.16 | 1644.62 | 5971.40 |
| ABC transporters | 2-Aminoethylphosphonate | neg_3412 | 5177.98 | 26680.91 | 2651.74 | 16735.03 |
| Hydroxyproline | neg_6665 | 8217.16 | 11768.22 | 42934.61 | 9173.77 |
| Maltotriose | neg_1054 | 3705.66 | 4535.85 | 6181.27 | 4074.97 |
| L-Proline | neg_5471 | 25050.54 | 29182.16 | 55119.59 | 34046.31 |
| Mannopine | pos_1404 | 2512.72 | 1071.99 | 2691.69 | 3765.39 |
| Deoxyguanosine | pos_8922 | 743.32 | 29.95 | 128.86 | 18.29 |
| D-Ribose | neg_1123 | 7620.94 | 6695.68 | 11629.07 | 7846.48 |
| Cellobiose | neg_8273 | 6651.75 | 10224.69 | 6375.21 | 8253.81 |
| alpha,alpha-Trehalose | neg_1043 | 321773.18 | 223467.23 | 409855.61 | 184626.07 |
| alpha-1,5-L-Arabinobiose | pos_1433 | 3013.47 | 6823.42 | 2763.83 | 14573.58 |
| L-Lysine | pos_8523 | 1228.69 | 65946.00 | 2002.84 | 9496.86 |
| D-Galacturonic acid | neg_4557 | 28044.86 | 73855.99 | 28696.04 | 49193.56 |
| glycerophospholipid metabolism | CDP-choline | pos_6019 | 1786.43 | 738.69 | 2260.27 | 6.52 |
| sn-Glycero-3-phosphocholine | neg_3497 | 1123.04 | 420.43 | 2061.07 | 2474.03 |
| 3-(O-Geranylgeranyl)-sn-glycerol 1-phosphate | neg_10334 | 1751.41 | 635.13 | 97.47 | 263.01 |

**Table S9.** The correlation results between physiological indices, hormones, and SWC.

| trait A | trait B | r | *p* |
| --- | --- | --- | --- |
| SP | SOD | -0.66 | 0.02 |
| SP | CAT | 0.72 | 0.01 |
| SP | MDA | 0.83 | 0.00 |
| SP | NSC | -0.75 | 0.00 |
| SS | SP | -0.72 | 0.01 |
| SS | Pro | -0.63 | 0.03 |
| SS | MDA | -0.85 | 0.00 |
| SS | NSC | 0.90 | 0.00 |
| Pro | MDA | 0.70 | 0.01 |
| Pro | NSC | -0.83 | 0.00 |
| Pro | Dihydrozeatin | 0.78 | 0.00 |
| SOD | CAT | -0.62 | 0.03 |
| NSC | MDA | -0.86 | 0.00 |
| NSC | Dihydrozeatin | -0.72 | 0.01 |
| ST | SP | -0.62 | 0.03 |
| ST | Pro | -0.83 | 0.00 |
| ST | MDA | -0.66 | 0.02 |
| ST | NSC | 0.86 | 0.00 |
| ST | Dihydrozeatin | -0.91 | 0.00 |
| ST | Indole-3-acetate | -0.66 | 0.02 |
| Zeatin | ST | -0.61 | 0.03 |
| Zeatin | Dihydrozeatin | 0.71 | 0.01 |
| Zeatin | Indole-3-acetate | 0.94 | 0.00 |
| Zeatin | SWC | -0.62 | 0.03 |
| Indole-3-acetate | Dihydrozeatin | 0.73 | 0.01 |
| SWC | Pro | -0.76 | 0.00 |
| SWC | ST | 0.84 | 0.00 |
| SWC | Dihydrozeatin | -0.91 | 0.00 |
| SWC | Indole-3-acetate | -0.68 | 0.02 |
