# Supplementary material
Source: Research Square preprint supplement (doi:10.21203/rs.3.rs-9072853/v1)
Supplement: Supplementary file 2 [file 9d0614b2c796883a3a191c10.docx]

FIGURE S1 Valiadation of differentially expressed genes by qRT-PCR
